# Supplementary material
Source: PubMed Central journal article supplement (PMC6688843)
Supplement: NIHMS1034686-supplement-1.pdf [file NIHMS1034686-supplement-1.pdf]

Figure S1

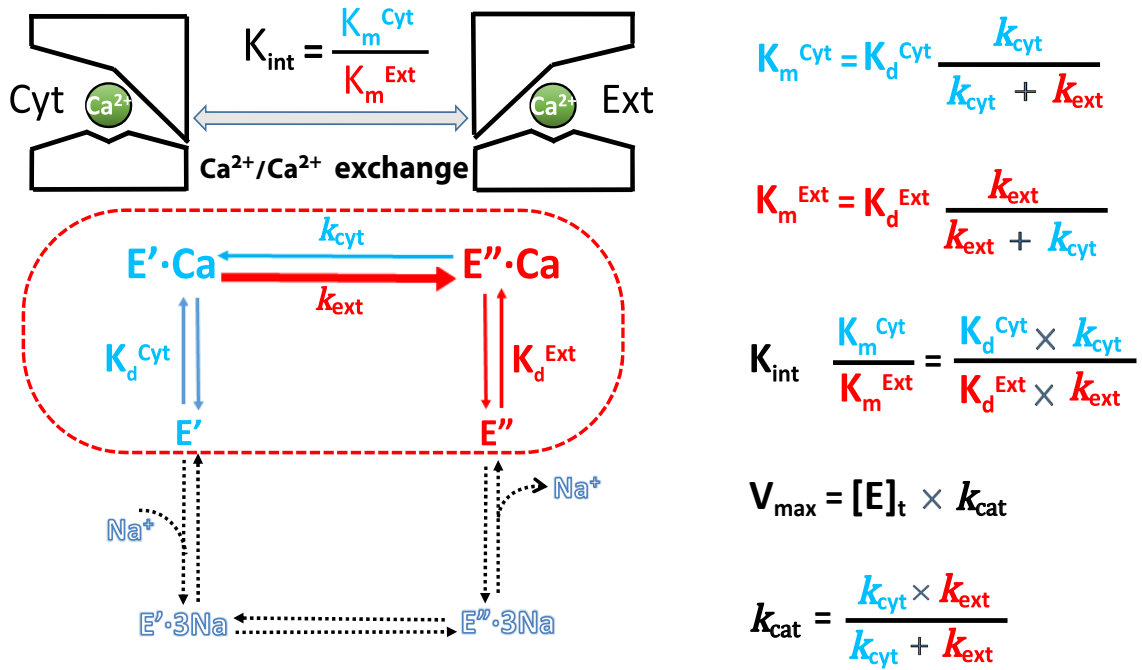

**Figure S1. The  $\text{Ca}^{2+}/\text{Ca}^{2+}$  exchange scheme.** The present formalism is explored for evaluating the kinetic and equilibrium parameters of  $\text{Ca}^{2+}/\text{Ca}^{2+}$  exchange with a goal of quantifying the intrinsic equilibrium ( $K_{\text{int}}$ ) and transport rates ( $k_{\text{cat}}$ ) of bidirectional  $\text{Ca}^{2+}$  movements in different mutants. According to this formalism, the  $\text{Ca}^{2+}$  binding equilibrium constants ( $K_{\text{d}}^{\text{Cyt}}$  and  $K_{\text{d}}^{\text{Ext}}$ ) and the rate constants of unidirectional  $\text{Ca}^{2+}$  transport ( $k_{\text{cyt}}$  and  $k_{\text{ext}}$ ) account for the observed  $K_{\text{m}}^{\text{Cyt}}$  and  $K_{\text{m}}^{\text{Ext}}$  values. Taking into account the fact that NCX\_Mj has very low turnover rates ( $k_{\text{cat}} < 1\text{s}^{-1}$ ) and high  $K_{\text{m}}^{\text{Cyt}}$  and  $K_{\text{m}}^{\text{Ext}}$  values (Figure S2) it is reasonable to assume that the transported  $^{45}\text{Ca}^{2+}$  ions become effectively diluted in a huge pool of "unlabeled"  $\text{Ca}^{2+}$  inside the vesicles. Since the present experimental conditions satisfy the criteria of unidirectional  $\text{Ca}^{2+}$  movements, the present equations can be used for practical purposes. Namely, the intrinsic equilibrium of bidirectional  $\text{Ca}^{2+}$  movements ( $K_{\text{int}} = K_{\text{m}}^{\text{Cyt}}/K_{\text{m}}^{\text{Ext}}$ ) can be presented as the ratio of the  $K_{\text{m}}^{\text{Cyt}}$  and  $K_{\text{m}}^{\text{Ext}}$  values. Thus,  $K_{\text{m}}^{\text{Cyt}}$  and  $K_{\text{m}}^{\text{Ext}}$  can be directly measured by detecting the unidirectional  $\text{Ca}^{2+}$  movements in two independent experiments. More specifically,  $K_{\text{m}}^{\text{Cyt}}$  can be determined at varying  $[\text{Ca}]_{\text{Cyt}}$  and saturating  $[\text{Ca}]_{\text{Ext}}$ , whereas  $K_{\text{m}}^{\text{Ext}}$  can be measured at varying  $[\text{Ca}]_{\text{Ext}}$  and saturating  $[\text{Ca}]_{\text{Cyt}}$ . Even though, the present formalism cannot distinguish between the equilibrium ( $K_{\text{d}}^{\text{Cyt}}$  and  $K_{\text{d}}^{\text{Ext}}$ ) and kinetic ( $k_{\text{cyt}}$  and  $k_{\text{ext}}$ ) "contributions" to the overall IF/OF equilibrium,  $K_{\text{int}}$  is still a very useful parameter for quantifying the functional asymmetry owned by a given mutant. In conjunction with this analysis, the transport rates ( $k_{\text{cat}}$ ) can be derived from the  $k_{\text{cat}} = V_{\text{max}}/[\text{E}]_{\text{t}}$  equation, by using the experimentally measured values of  $V_{\text{max}}$  and  $[\text{E}]_{\text{t}}$  (see Materials and Methods).

Figure S2

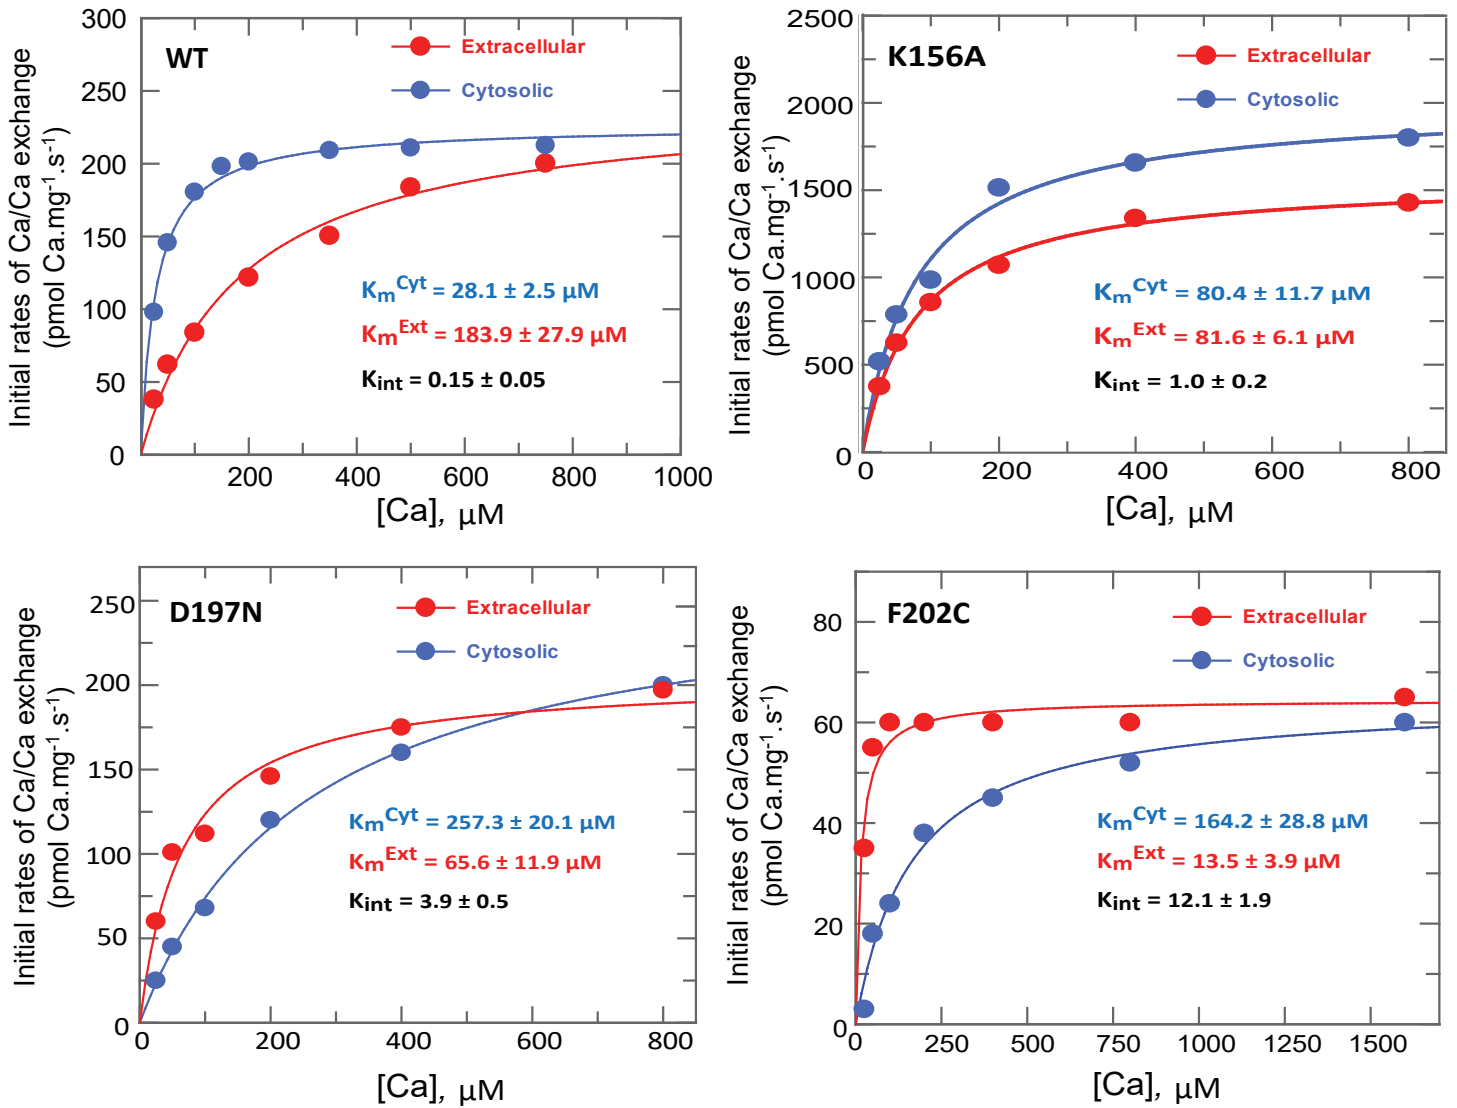

**Figure S2. The  $K_m^{Cyt}$  and  $K_m^{Ext}$  values measured in three mutants.** The initial rates of Ca<sup>2+</sup>-dependent <sup>45</sup>Ca<sup>2+</sup>-uptake were measured for determining the  $K_m^{Cyt}$  and  $K_m^{Ext}$  values in three representative mutants (K156A, S197N and F202C). For this purpose, the E coli-derived vesicles containing a given mutant were preloaded with Ca<sup>2+</sup> (as indicated below). The Ca<sup>2+</sup>-loaded vesicles were diluted 200-500 fold in the assay medium containing <sup>45</sup>Ca<sup>2+</sup> and the reaction of <sup>45</sup>Ca<sup>2+</sup>-uptake were quenched after 5 seconds by rapid injection of cold EGTA buffer (see Materials and Methods). The  $K_m^{Cyt}$  values were determined at varying [Ca]<sub>Cyt</sub> (2-1500 μM) and saturating [Ca]<sub>Ext</sub> (1500 μM), whereas the  $K_m^{Ext}$  values were measured at varying [Ca]<sub>Ext</sub> (2-1500 μM) and saturating [Ca]<sub>Cyt</sub> (1500 μM). The  $K_m$  and  $V_{max}$  values of the Ca<sup>2+</sup>/Ca<sup>2+</sup> exchange were obtained by fitting the experimental points with calculated lines by using a criteria of a minimal  $\chi^2$  value (GraFit 7.0 software, Erithacus Software, Ltd.). The standard errors ( $\pm$ SE) for  $K_m$  or  $V_{max}$  were calculated by using the matrix inversion method as recommended by GraFit 7

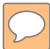

Figure S3

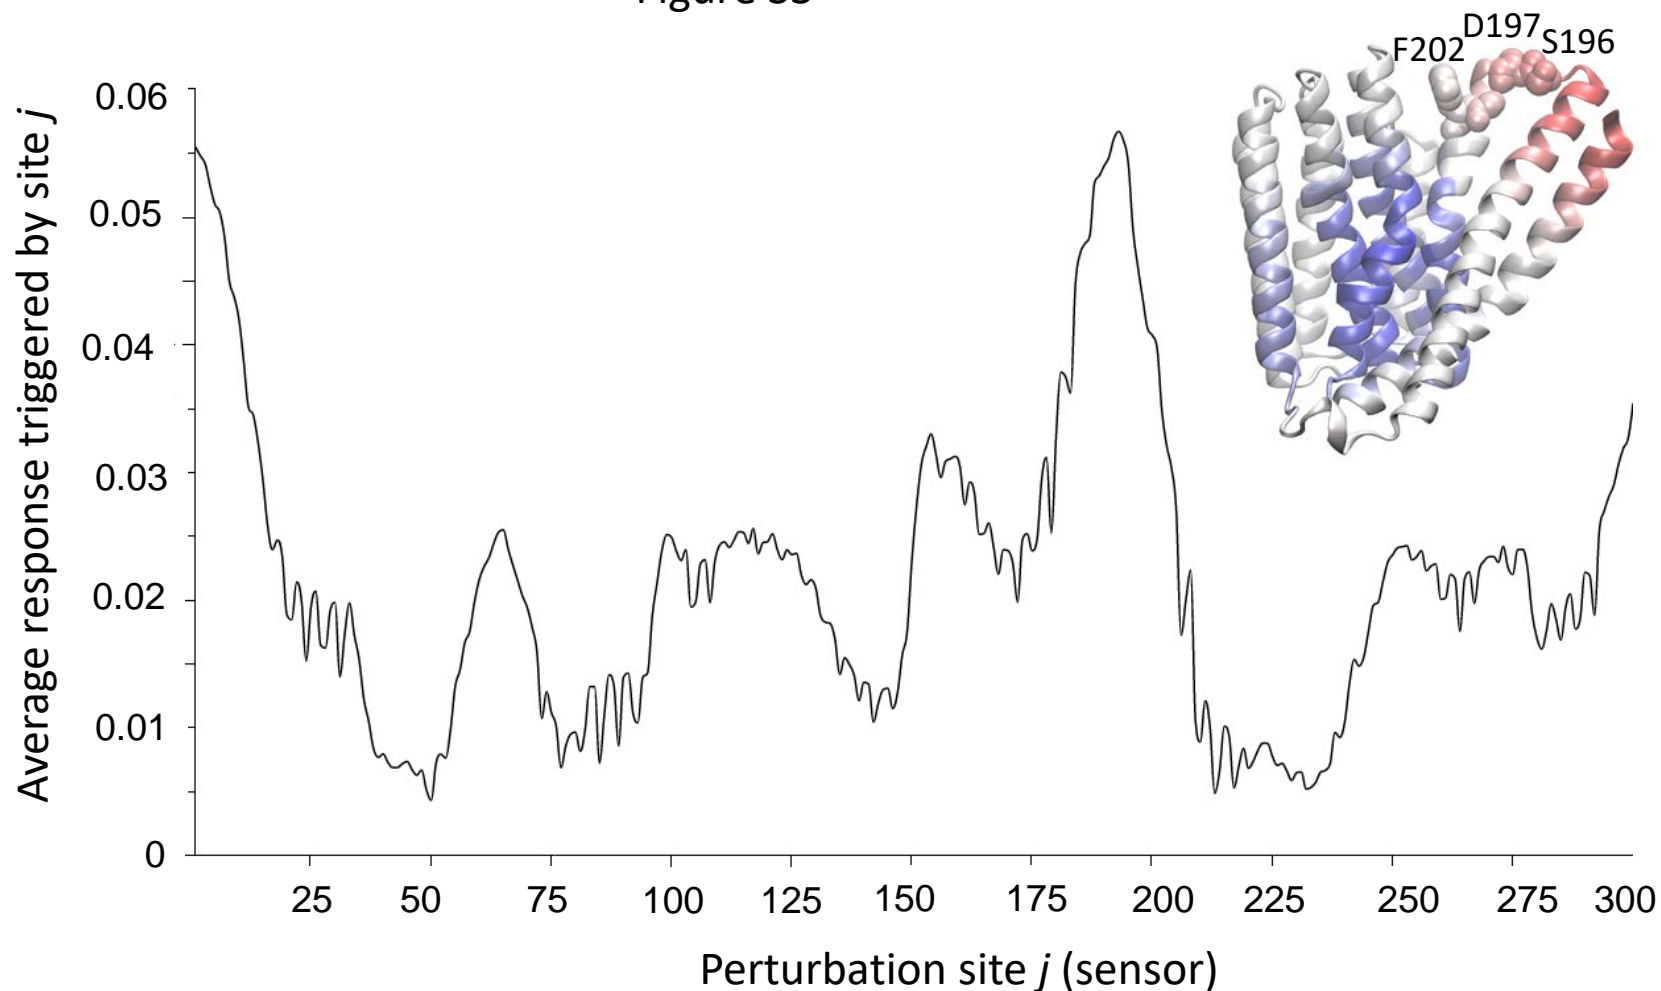

**Figure S3: Propensity of NCX\_Mj residues to serve as sensors, based on perturbation-response scanning (PRS) analysis.** The PRS analysis identifies highly sensitive residues (peaks in the profile) that are likely to serve as sensors of allosteric signals. The inset protein structure is color-coded by the propensity to serve as sensors (red: most probable; blue: least probable). We note that the S196-D197-K198 segment in TM7 is distinguished by its high propensity for acting as a sensor in addition to the N-terminus.
